# Supplementary material for: Requirement for p62 acetylation in the aggregation of ubiquitylated proteins under nutrient stress
Source: PubMed Central journal article supplement (PMC6923396; doi:10.1038/s41467-019-13718-w), 2019-12-19
Supplement: 41467_2019_13718_MOESM3_ESM.pdf [file 41467_2019_13718_MOESM3_ESM.pdf]

## Reporting Summary

Nature Research wishes to improve the reproducibility of the work that we publish. This form provides structure for consistency and transparency in reporting. For further information on Nature Research policies, see [Authors & Referees](#) and the [Editorial Policy Checklist](#).

### Statistics

For all statistical analyses, confirm that the following items are present in the figure legend, table legend, main text, or Methods section.

n/a Confirmed

- |                                     |                                     |                                                                                                                                                                                                                                                            |
|-------------------------------------|-------------------------------------|------------------------------------------------------------------------------------------------------------------------------------------------------------------------------------------------------------------------------------------------------------|
| <input type="checkbox"/>            | <input checked="" type="checkbox"/> | The exact sample size ( $n$ ) for each experimental group/condition, given as a discrete number and unit of measurement                                                                                                                                    |
| <input type="checkbox"/>            | <input checked="" type="checkbox"/> | A statement on whether measurements were taken from distinct samples or whether the same sample was measured repeatedly                                                                                                                                    |
| <input type="checkbox"/>            | <input checked="" type="checkbox"/> | The statistical test(s) used AND whether they are one- or two-sided<br><i>Only common tests should be described solely by name; describe more complex techniques in the Methods section.</i>                                                               |
| <input checked="" type="checkbox"/> | <input type="checkbox"/>            | A description of all covariates tested                                                                                                                                                                                                                     |
| <input type="checkbox"/>            | <input checked="" type="checkbox"/> | A description of any assumptions or corrections, such as tests of normality and adjustment for multiple comparisons                                                                                                                                        |
| <input type="checkbox"/>            | <input checked="" type="checkbox"/> | A full description of the statistical parameters including central tendency (e.g. means) or other basic estimates (e.g. regression coefficient) AND variation (e.g. standard deviation) or associated estimates of uncertainty (e.g. confidence intervals) |
| <input checked="" type="checkbox"/> | <input type="checkbox"/>            | For null hypothesis testing, the test statistic (e.g. $F$ , $t$ , $r$ ) with confidence intervals, effect sizes, degrees of freedom and $P$ value noted<br><i>Give <math>P</math> values as exact values whenever suitable.</i>                            |
| <input checked="" type="checkbox"/> | <input type="checkbox"/>            | For Bayesian analysis, information on the choice of priors and Markov chain Monte Carlo settings                                                                                                                                                           |
| <input checked="" type="checkbox"/> | <input type="checkbox"/>            | For hierarchical and complex designs, identification of the appropriate level for tests and full reporting of outcomes                                                                                                                                     |
| <input checked="" type="checkbox"/> | <input type="checkbox"/>            | Estimates of effect sizes (e.g. Cohen's $d$ , Pearson's $r$ ), indicating how they were calculated                                                                                                                                                         |

*Our web collection on [statistics for biologists](#) contains articles on many of the points above.*

### Software and code

Policy information about [availability of computer code](#)

Data collection

Zeiss LSM 800 confocal microscope; Bruker ASCEND 600MHz NMR magnet system; Odyssey infrared imaging system\_v3.0; SpectraMax M5/M5e.

Data analysis

Zen Lite 2012; Microsoft Excel 2007; NMRPipe\_v2010; CCPN Analysis\_v2.4.2; GraphPad Prism 8.0; Image J\_v1.8.0; PyMOL\_v2.3.2.

For manuscripts utilizing custom algorithms or software that are central to the research but not yet described in published literature, software must be made available to editors/reviewers. We strongly encourage code deposition in a community repository (e.g. GitHub). See the Nature Research [guidelines for submitting code & software](#) for further information.

### Data

Policy information about [availability of data](#)

All manuscripts must include a [data availability statement](#). This statement should provide the following information, where applicable:

- Accession codes, unique identifiers, or web links for publicly available datasets
- A list of figures that have associated raw data
- A description of any restrictions on data availability

The data that support this study are available from the corresponding authors upon reasonable request.

### Field-specific reporting

Please select the one below that is the best fit for your research. If you are not sure, read the appropriate sections before making your selection.

- Life sciences       Behavioural & social sciences       Ecological, evolutionary & environmental sciences

## Life sciences study design

All studies must disclose on these points even when the disclosure is negative.

|                 |                                                                                                                           |
|-----------------|---------------------------------------------------------------------------------------------------------------------------|
| Sample size     | Sample sizes were determined depending on the experimental settings.                                                      |
| Data exclusions | No data was excluded.                                                                                                     |
| Replication     | Unless specified, experiments were confirmed with three biological replicates, and the representative results were shown. |
| Randomization   | No randomization was adopted in this study.                                                                               |
| Blinding        | No blinding was adopted in this study.                                                                                    |

## Reporting for specific materials, systems and methods

We require information from authors about some types of materials, experimental systems and methods used in many studies. Here, indicate whether each material, system or method listed is relevant to your study. If you are not sure if a list item applies to your research, read the appropriate section before selecting a response.

### Materials & experimental systems

| n/a                                 | Involvement in the study                                  |
|-------------------------------------|-----------------------------------------------------------|
| <input type="checkbox"/>            | <input checked="" type="checkbox"/> Antibodies            |
| <input type="checkbox"/>            | <input checked="" type="checkbox"/> Eukaryotic cell lines |
| <input checked="" type="checkbox"/> | <input type="checkbox"/> Palaeontology                    |
| <input checked="" type="checkbox"/> | <input type="checkbox"/> Animals and other organisms      |
| <input checked="" type="checkbox"/> | <input type="checkbox"/> Human research participants      |
| <input checked="" type="checkbox"/> | <input type="checkbox"/> Clinical data                    |

### Methods

| n/a                                 | Involvement in the study                        |
|-------------------------------------|-------------------------------------------------|
| <input checked="" type="checkbox"/> | <input type="checkbox"/> ChIP-seq               |
| <input checked="" type="checkbox"/> | <input type="checkbox"/> Flow cytometry         |
| <input checked="" type="checkbox"/> | <input type="checkbox"/> MRI-based neuroimaging |

## Antibodies

Antibodies used

Primary antibodies:

Rabbit anti-ATG7 (A2856, Sigma-Aldrich), 1:1000 dilution for western blot;  
 Rabbit anti- $\alpha$ -tubulin (Lys40) (SAB5600134, Sigma-Aldrich), 1:1000 dilution for western blot;  
 Mouse anti- $\beta$ -actin (A5316, Sigma-Aldrich), 1:3000 dilution for western blot;  
 Mouse anti- $\alpha$ -tubulin (T5293, Sigma-Aldrich), 1:3000 dilution for western blot;  
 Rabbit anti-Flag (0912-1, HuaBio), 1:1000 dilution for western blot, 1:100 for immunoprecipitation and immunofluorescence;  
 Rabbit anti-HA (0906-1; HuaBio), 1:1000 dilution for western blot, 1:100 for immunoprecipitation;  
 Rabbit anti-p300 (SC-585, Santa Cruz); 1:200 dilution for western blot;  
 Rabbit anti-GST (SC-33613, Santa Cruz); 1:500 dilution for western blot;  
 Mouse anti-Flag (SC-807, Santa Cruz); 1:500 dilution for western blot, 1:100 for immunoprecipitation;  
 Mouse anti-HA (SC-57592, Santa Cruz); 1:500 dilution for western blot, 1:100 for immunoprecipitation;  
 Mouse anti-acetylated-lysine (SC-32268, Santa Cruz); 1:500 dilution for western blot, 1:100 for immunoprecipitation;  
 Mouse anti-GCN5 (SC-365321; Santa Cruz); 1:200 dilution for western blot;  
 Mouse anti-HDAC6 (SC-28386, Santa Cruz); 1:200 dilution for western blot;  
 Mouse anti-ubiquitin (SC-8017; Santa Cruz); 1:500 dilution for western blot, 1:100 for immunofluorescence;  
 Rabbit anti-GFP (598, MBL); 1:1000 dilution for western blot;  
 Rabbit anti-PCAF (C14G9, Cell Signaling Technology); 1:1000 dilution for western blot, ;  
 Rabbit anti-acetylated-lysine (9441, Cell Signaling Technology); 1:1000 dilution for western blot; 1:100 for immunoprecipitation;  
 Rabbit anti-phospho-tyrosine (9411, Cell Signaling Technology); 1:1000 dilution for western blot;  
 Rabbit anti-TIP60 (10827-1-AP; Proteintech); 1:1000 dilution for western blot;  
 Rabbit anti-p62 (18420-1-AP, Proteintech); 1:1000 dilution for western blot, 1:100 for immunoprecipitation;  
 Rabbit anti-phospho-serine (61-8100, Invitrogen); 1:1000 dilution for western blot.

Secondary antibodies:

Donkey anti-mouse IRDye680 (926-32222; LI-COR Biosciences); 1:3000 dilution for immunofluorescence;  
 Donkey anti-rabbit IRDye800CW (926-32212; LI-COR Biosciences); 1:3000 dilution for immunofluorescence;  
 Donkey anti-rabbit Alexa Fluor 488 (A21206, Invitrogen); 1:300 dilution for immunofluorescence;  
 Goat anti-mouse Alexa Fluor 635 (A31574, Invitrogen); 1:300 dilution for immunofluorescence.

Validation

All the antibodies have been verified by the manufacturers according to the introductions on their websites.

## Eukaryotic cell lines

---

Policy information about [cell lines](#)

|                                                                      |                                                                                                                                                                                                                |
|----------------------------------------------------------------------|----------------------------------------------------------------------------------------------------------------------------------------------------------------------------------------------------------------|
| Cell line source(s)                                                  | HEK293, HEK293T and HeLa cells were obtained from ATCC ( <a href="http://www.atcc.org/">http://www.atcc.org/</a> ). p62-KO HEK293 cells were generated by using CRISPR-Cas9 system.                            |
| Authentication                                                       | HEK293, HEK293T and HeLa cells used in this study were verified by ATCC ( <a href="http://www.atcc.org/">http://www.atcc.org/</a> ). p62-KO HEK293 cells were verified by western blot and immunofluorescence. |
| Mycoplasma contamination                                             | The cell lines were not tested for mycoplasma contamination.                                                                                                                                                   |
| Commonly misidentified lines<br>(See <a href="#">ICLAC</a> register) | There are no misidentified cell lines in this study.                                                                                                                                                           |
